# Supplementary material for: The European 2015 drought from a climatological perspective
Source: Copernicus journal article supplement (doi:10.5194/hess-2016-218), 2016-05-19
Supplement: Supplementary file 1 [file hess-2016-218-supplement.pdf]

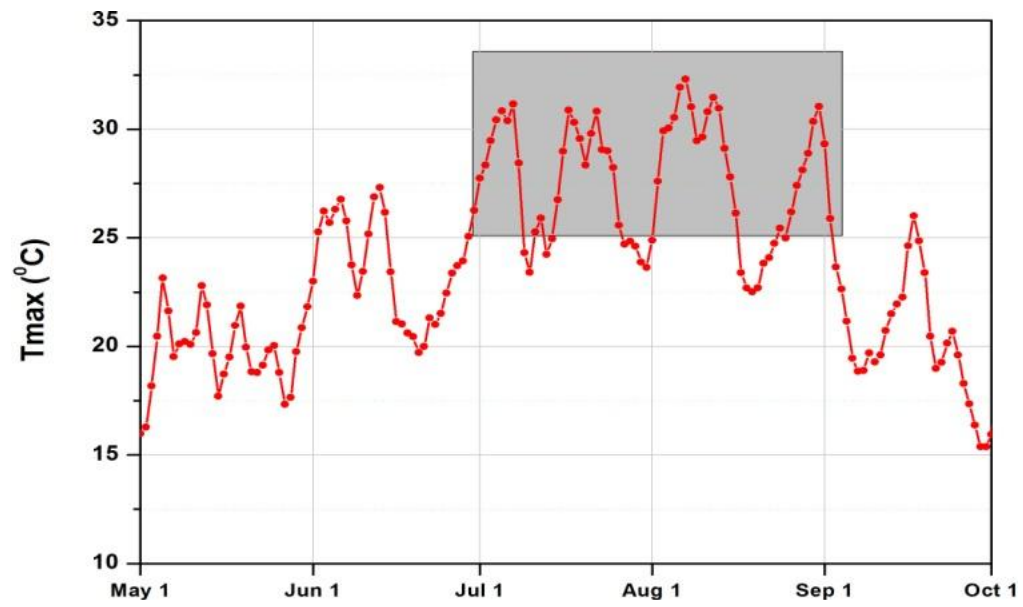

**Figure S1** Daily evolution of  $T_{\max}$  over the period 1st of May 2015 – 30 September 2015 averaged over the region: 0 – 30°E, 40 - 55°N. The grey box indicates periods when  $T_{\max} > 25^{\circ}\text{C}$ .

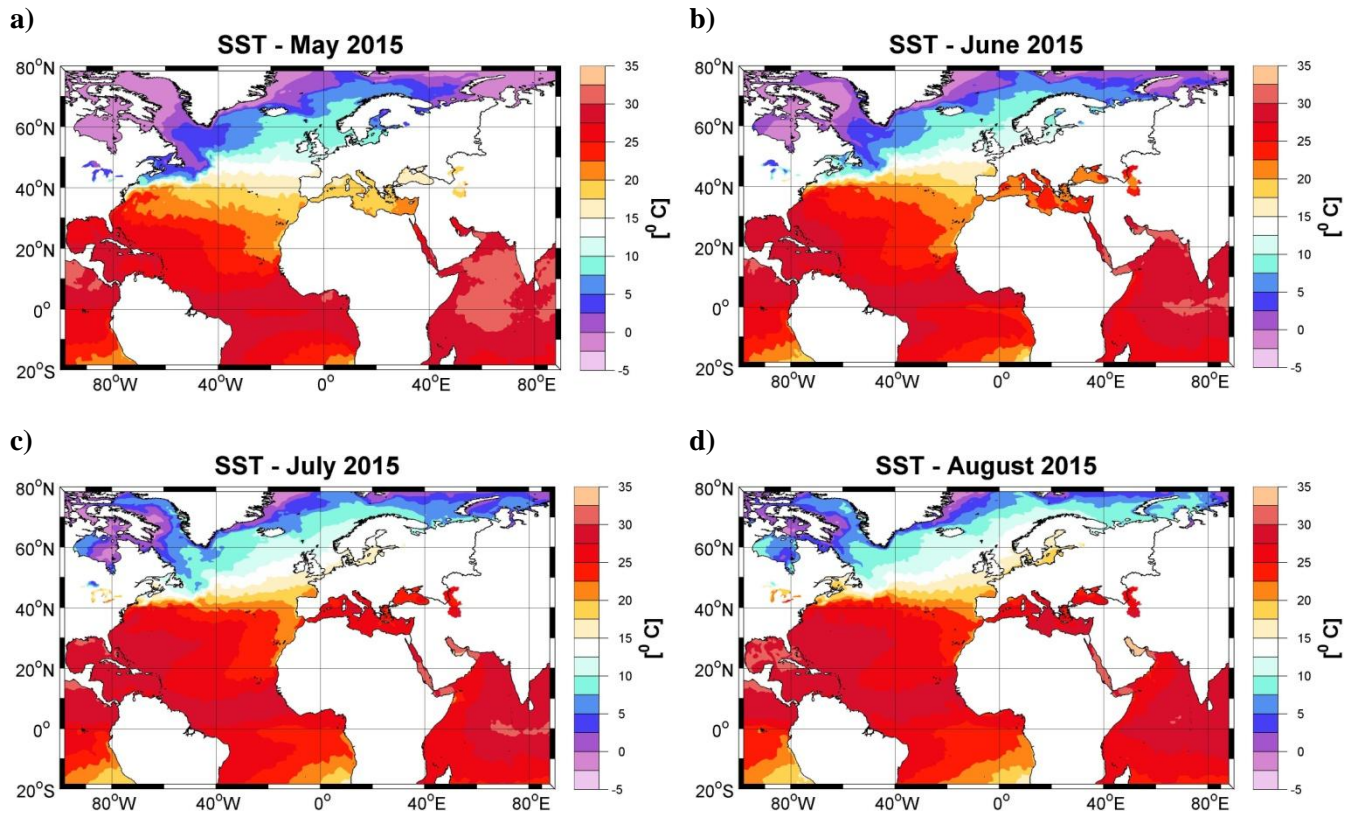

**Figure S2** a) May 2015 mean SST; b) as in a) but for June 2015; c) in a) but for July 2015 and d) as in a) but for August 2015.

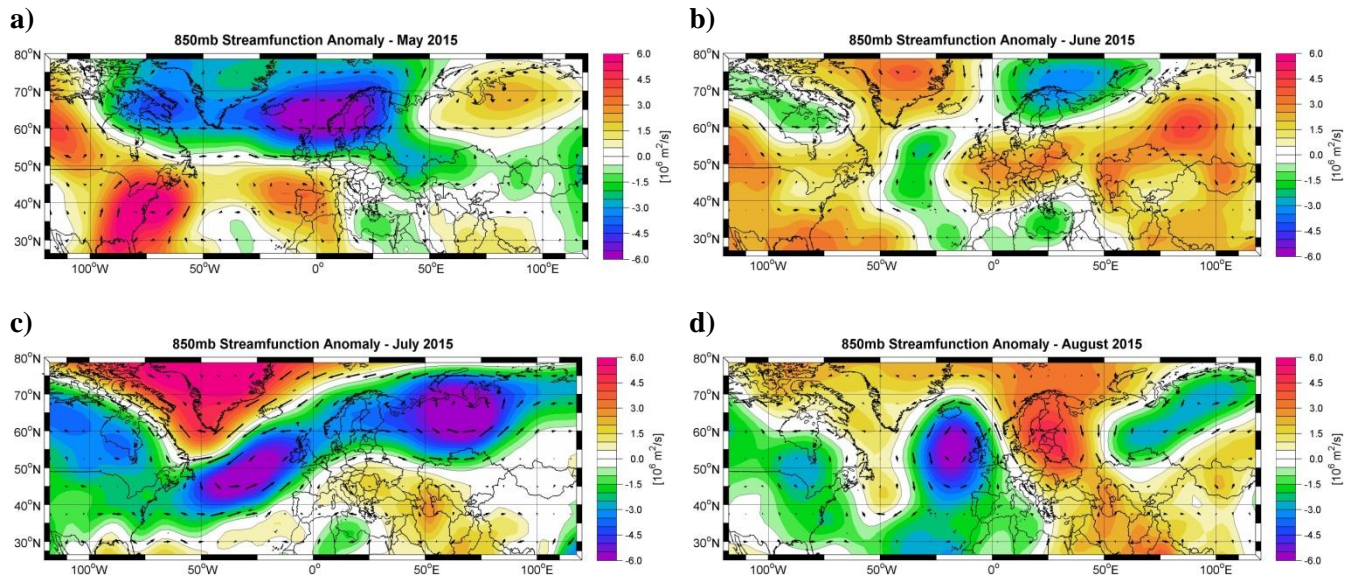

**Figure S3** a) 850-hPa streamfunction anomalies for May 2015; b) as in a) but for June 2015; c) as in a) but for July 2015; d) as in a) but for August 2015. The anomalies are computed relative to the period 1971 – 2000.

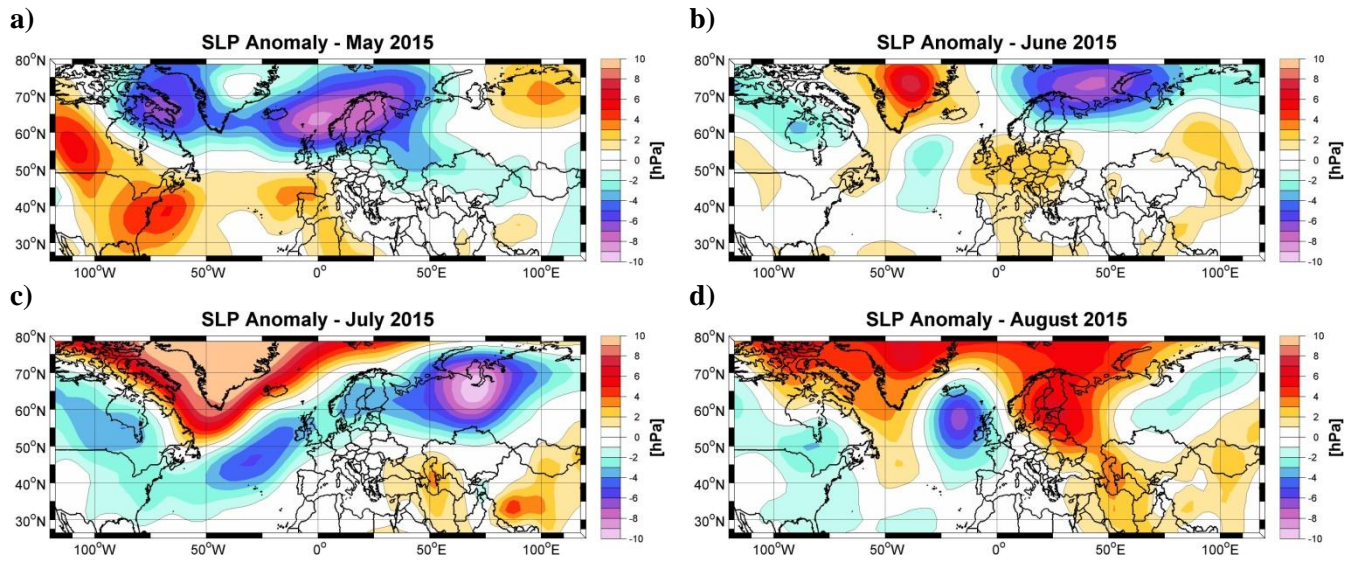

**Figure S4** a) SLP anomalies for May 2015; b) as in a) but for June 2015; c) as in a) but for July 2015; d) as in a) but for August 2015. The anomalies are computed relative to the period 1971 – 2000.



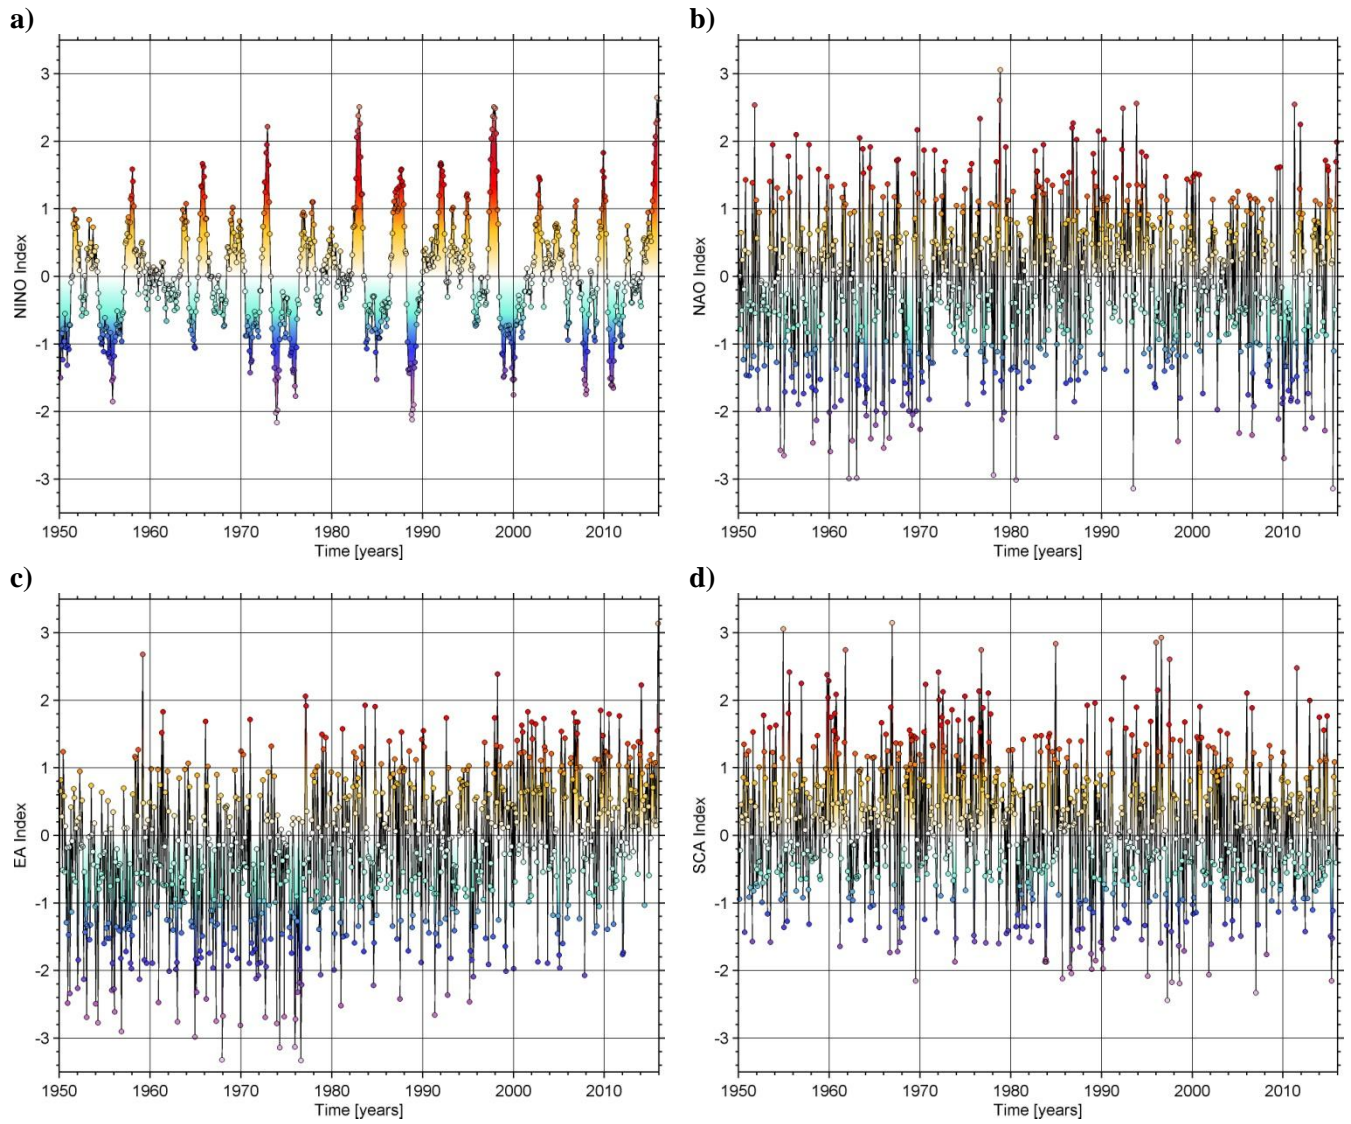

**Figure S5** As in Figure 9, but for the period 1950 – 2015.

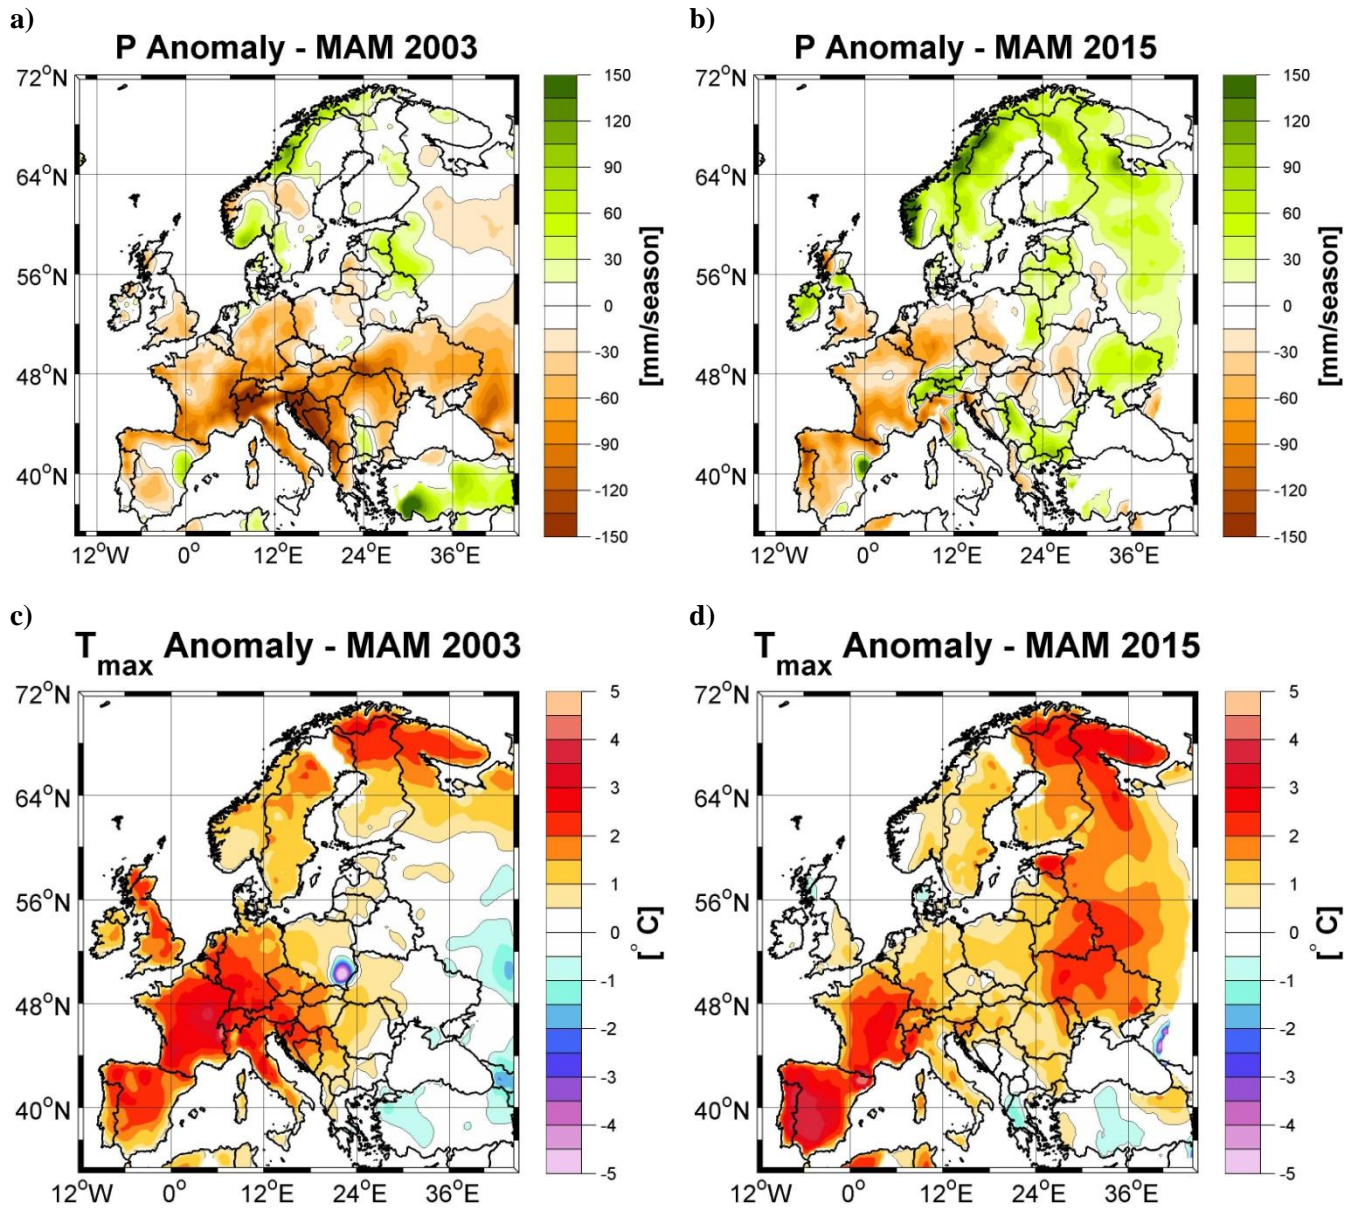

**Figure S6** a) Spring (MAM) 2003 P anomalies; b) as in a) but for spring 2015; c) Spring 2003 T<sub>max</sub> anomalies; d) as in c) but for spring 2015. The anomalies are computed relative to the period 1971 – 2000.



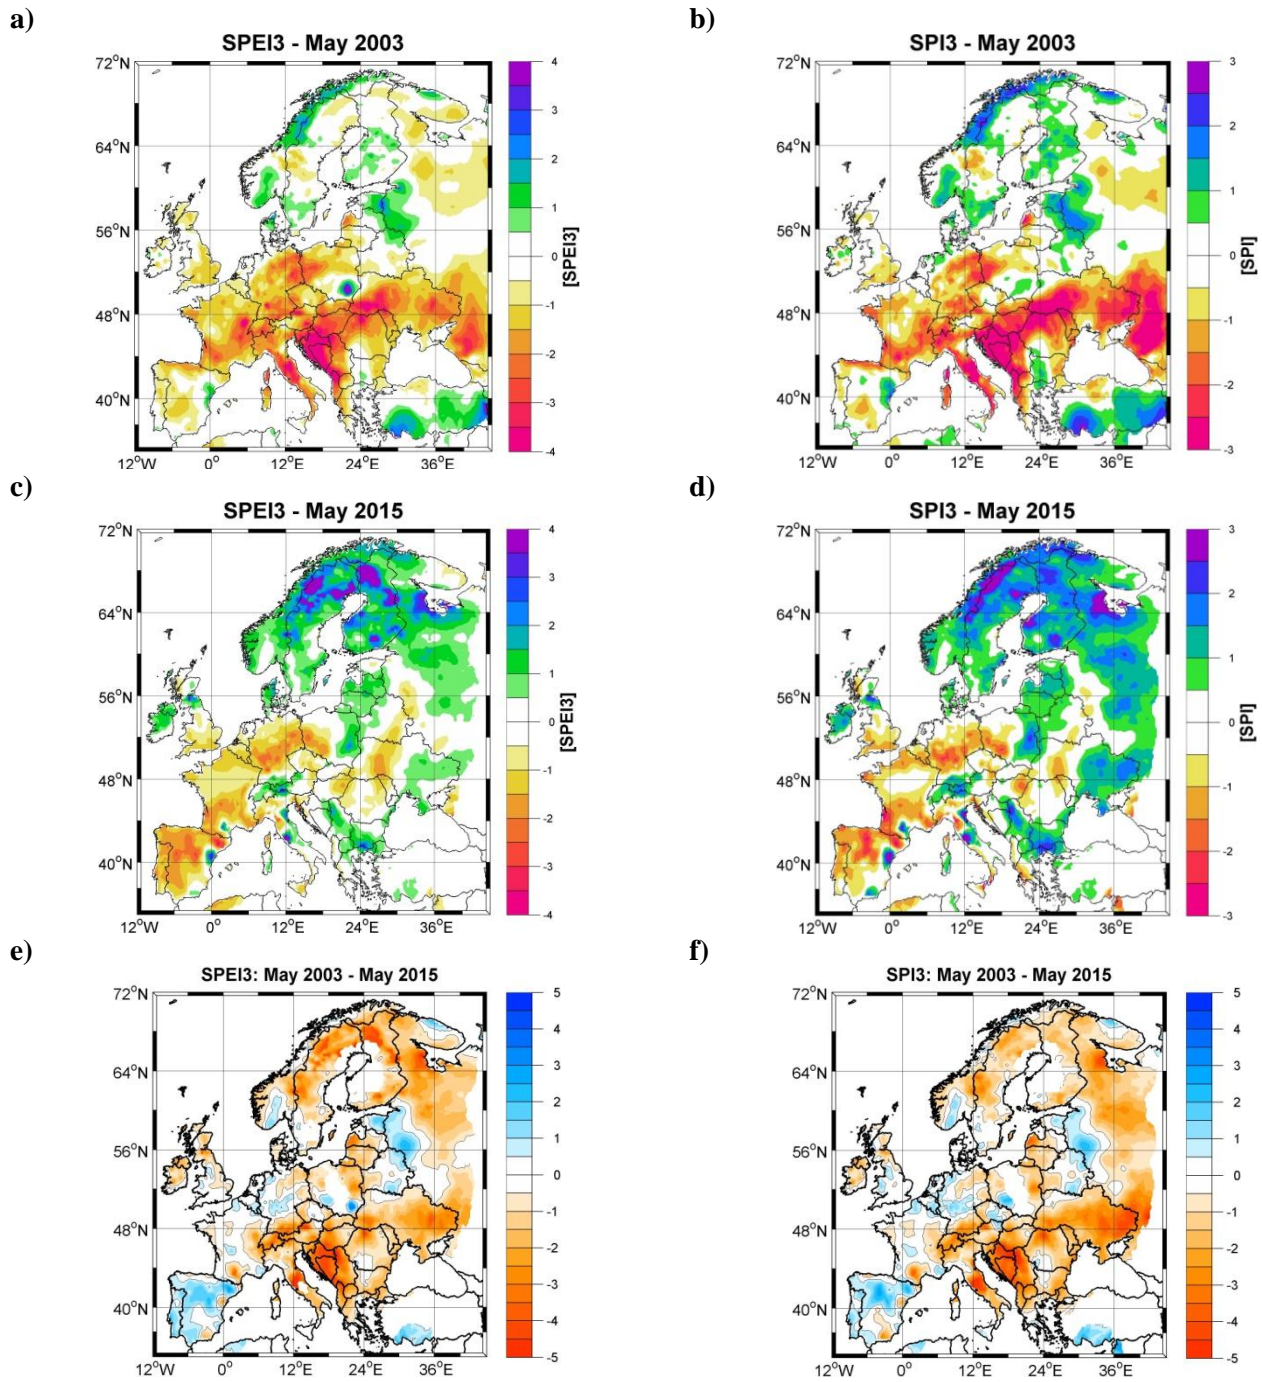

**Figure S7** a) May SPEI3 2003; b) as in a) but for May 2015; c) May 2003 SPI3; d) as in c) but for May 2015; e) The difference between May 2003 SPEI3 and May 2015 SPEI3; f) as in e) but for SPI3.

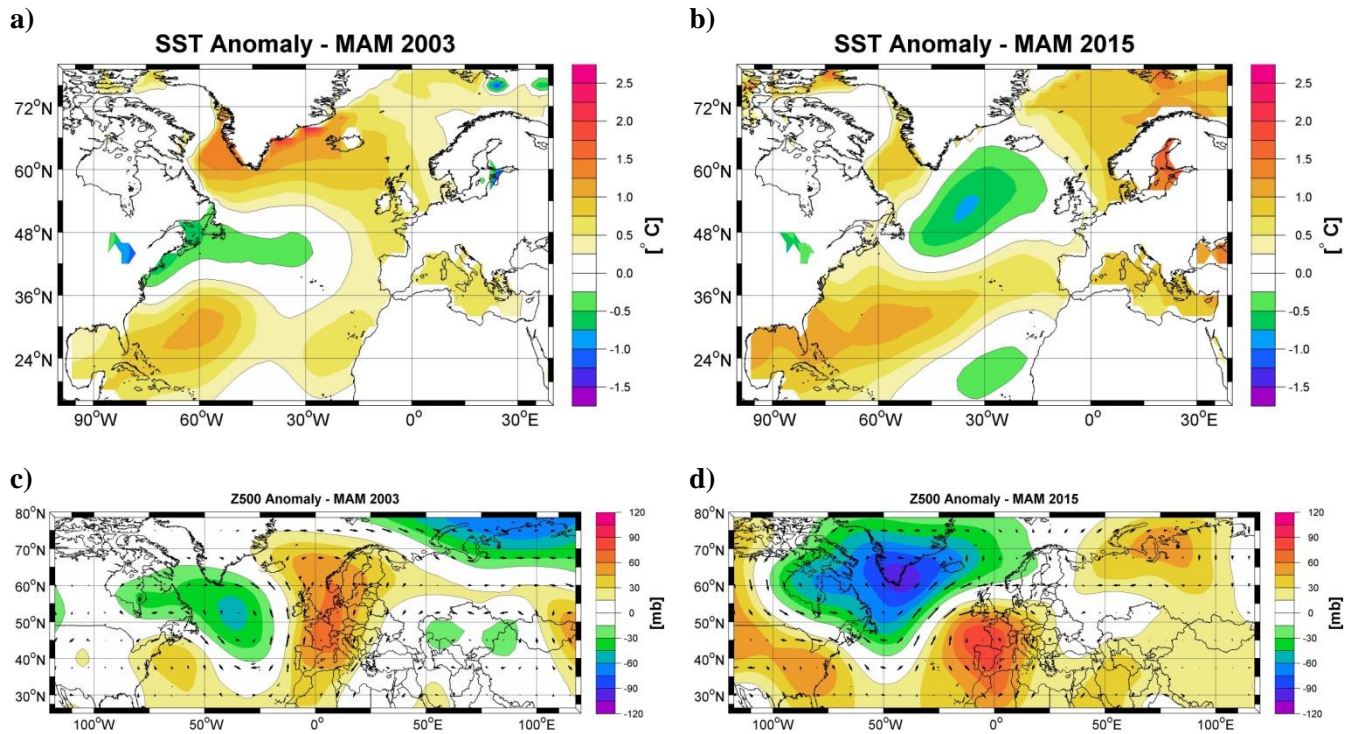

**Figure S8** a) Spring 2003 SST anomalies; b) as in a) but for spring 2015; c) Spring 2003 Z500 anomalies; d) as in c) but for spring 2015. The anomalies are computed relative to the period 1971 – 2000.
